# Supplementary material for: Valorization of Wheat Bran by Three Fungi Solid-State Fermentation: Physicochemical Properties, Antioxidant Activity and Flavor Characteristics
Source: MDPI journal article supplement (doi:10.3390/foods11121722), 2022-06-13
Supplement: s1 [file s1]

## Supporting Information

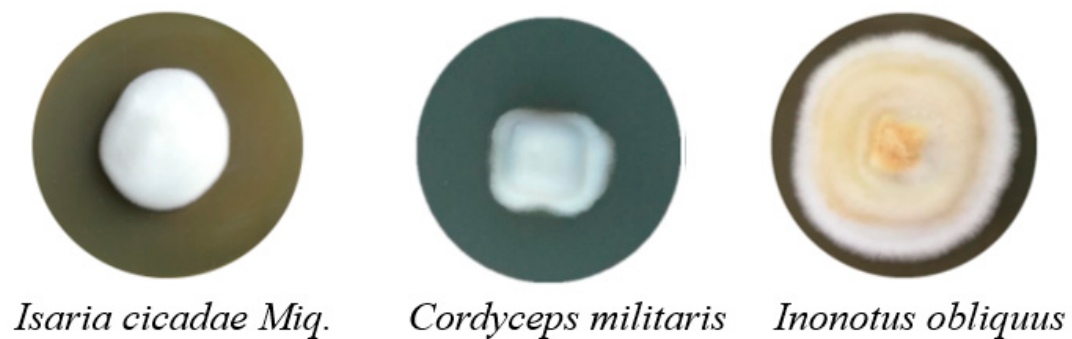

**Figure S1.** Colony photos of three medicinal fungi (*Isaria cicadae* Miq.;

*Cordyceps militaris*; *Inonotus obliquus*)

**Table S1.** The chemical composition of the wheat bran powder

| Composition | Content (%) |
|-------------|-------------|
| Starch      | 18.31±0.09  |
| Protein     | 14.77±0.30  |
| Fat         | 2.96±0.03   |
| Water       | 12.28±0.09  |
| Ash         | 5.74±0.06   |
| IDF         | 42.19±0.17  |
| SDF         | 3.75±0.05   |

Note: Data are expressed as mean  $\pm$  standard deviation. IDF, insoluble dietary fiber; SDF, soluble dietary fiber.

**Table S2.** The relative molecular weight of soluble dietary fiber (SDF)

| Molecular weight                        | US-SDF(%)               | IC-SDF(%)               | CM-SDF(%)               | IO-SDF(%)               |
|-----------------------------------------|-------------------------|-------------------------|-------------------------|-------------------------|
| >2×10 <sup>6</sup> Da                   | 38.43±0.21 <sup>c</sup> | 82.53±0.74 <sup>a</sup> | 49.60±0.27 <sup>b</sup> | 36.59±0.59 <sup>d</sup> |
| 2×10 <sup>5</sup> -2×10 <sup>6</sup> Da | 37.08±0.30 <sup>a</sup> | 13.95±0.44 <sup>d</sup> | 30.50±0.39 <sup>c</sup> | 31.76±0.23 <sup>b</sup> |
| 1×10 <sup>4</sup> -2×10 <sup>5</sup> Da | 17.73±0.48 <sup>a</sup> | 3.52±0.30 <sup>d</sup>  | 7.15±0.26 <sup>c</sup>  | 11.35±0.36 <sup>b</sup> |
| <1×10 <sup>4</sup> Da                   | 6.76±0.58 <sup>c</sup>  | 0.00±0.00 <sup>d</sup>  | 12.75±0.14 <sup>b</sup> | 20.30±0.71 <sup>a</sup> |

Note: Data are expressed as mean ± standard deviation. Different lowercase letters indicate significant differences at  $p < 0.05$  in terms of microorganisms. US-SDF, unfermented sterilized wheat bran soluble dietary fiber; IC-SDF, *Isaria cicadae* Miq. fermented wheat bran soluble dietary fiber; CM-SDF, *Cordyceps militaris* fermented wheat bran soluble dietary fiber; IO-SDF, *Inonotus obliquus* fermented wheat bran soluble dietary fiber.
